# Supplementary material
Source: ML conference proceedings conference paper supplement (https://proceedings.neurips.cc/paper_files/paper/2013/hash/e836d813fd184325132fca8edcdfb40e-Abstract.html)
Supplement: Supplementary file [file e836d813fd184325132fca8edcdfb40e-Supplemental.zip]

## 7 Appendix

### 7.1 Proof of the Proposition 3

In order to prove that result, one needs some intermediate results. Let  $H_U$  (resp.  $H_{U_y^x}$ ) be the submatrix of  $H$  corresponding to prefixes in  $U$  (resp. of the form  $u_y^x$  with  $u \in U$ ). Let  $H_V$  (resp.  $H_{yV}^x$ ) be the submatrix of  $H$  corresponding to suffixes in  $V$  (resp. of the form  $y_v^x$  with  $v \in V$ ).

**Lemma 1.** *Let  $u$  and  $v$  be two vectors such that  $u^\top H_\varepsilon = v^\top H_\varepsilon$ . Then, for  $x \in \Sigma_+ \cup \{*\}$ ,  $y \in \Sigma_- \cup \{*\}$ , one has  $u^\top H_y^x = v^\top H_y^x$ .*

*Proof.*  $H_\varepsilon$  is a submatrix of  $H_U$  with the same rank.

Let  $u$  and  $v$  be two vectors such that  $u^\top H_\varepsilon = v^\top H_\varepsilon$ , then  $u^\top H_U = v^\top H_U$  because  $H_\varepsilon$  and  $H_U$  have the same rank. Thus, as each  $H_y^x$  is a submatrix of  $H_U$ , one has  $u^\top H_y^x = v^\top H_y^x$ .  $\square$

**Lemma 2.** *Let  $u \in U\Sigma$ . Then the vector*

$$\sum_{\substack{x_1 \dots x_n \\ y_1 \dots y_n \in u}} (H_{y_n}^{x_n})^\top \dots (H_{y_1}^{x_1} H_\varepsilon^+)^\top ((H_\varepsilon^+)^\top H_1)$$

*is the row of  $H_V$  corresponding to the prefix  $u$ . In particular, if  $u \in U$ , the vector is equal to the row of  $H_\varepsilon$  corresponding to the prefix  $u$ .*

*Proof.* By induction.  $H_1$  is the row of  $H_V$  corresponding to  $\varepsilon$ .

1) Let us suppose that  $u = u_y^x$ . Because  $U\Sigma$  is prefix-closed, one has  $u' \in U\Sigma$ . Let  $z'$  be the row of  $H_V$  corresponding to  $u'$ .  $(H_\varepsilon^+)^\top z'$  represents a decomposition of  $z'$  in terms of rows of  $H_\varepsilon$ . The vector  $(H_y^x)^\top (H_\varepsilon^+)^\top z$  is the same linear combination of rows of  $H_{yV}^x$ , and by rank equality is the same as the row of  $H_{yV}^x$  corresponding to  $u'$ . Because  $H$  is a Hankel matrix, it is equal to the row of  $H_V$  corresponding to  $u_y^x = u$ .

2) Let us suppose that  $u = [s_{1:n}, t_{1:k}]$ . Then  $u_1 = [s_{1:n-1}, t_{1:k}]_{*}^{s_n} \in U\Sigma$ ,  $u_2 = [s_{1:n}, t_{1:k-1}]_{t_k}^* \in U\Sigma$ ,  $u_3 = [s_{1:n-1}, t_{1:k-1}]_{t_k}^{s_n} \in U\Sigma$ . With the same argument as before applied to  $u_1$ ,  $u_2$  and  $u_3$ , and because  $H$  is Hankel, one has the result.  $\square$

One has then the symmetric result for the suffixes.

**Lemma 3.** *Let  $v \in \Sigma V$ . Then the vector*

$$\sum_{\substack{x_1 \dots x_n \\ y_1 \dots y_n \in v}} (H_{y_1}^{x_1}) \dots (H_{y_n}^{x_n} H_\varepsilon^+) (H_\infty)$$

*is the column of  $H_U$  corresponding to the suffix  $v$ . In particular, if  $v \in V$ , the vector is equal to the column of  $H_\varepsilon$  corresponding to the suffix  $v$ .*

*Proof.* It is just the symmetric case of the previous lemma.  $\square$

#### 7.1.1 Proof of the Proposition 3

Let  $u \in U$ ,  $v \in V$ . Let  $H_u$  be the row of  $H_\varepsilon$  corresponding to  $u$ ,  $H_v$  the column of  $H_\varepsilon$  corresponding to  $v$ . One then has, by Lemma 2 and Lemma 3,  $r_M(uv) = H_u^\top H_\varepsilon^+ H_v$ . The vector  $H_\varepsilon^+ H_v$  represents a decomposition of  $H_v$  equivalent to the vector  $\mathbf{1}_v$ . Then  $r_M(uv) = H_u^\top \mathbf{1}_v = H_\varepsilon(u, v)$ .  $\square$

### 7.2 Proof of the Proposition 4

**Definition 14.** *Let  $p$  be a distribution over i/o sequences computed by an FST. Let  $\text{rank}(p)$  be the minimal integer  $d$  such that there exist an FST with  $d$  states computing  $p$ . Let  $\mathcal{V}_p$  be the class of parameters for all rank- $d$  FSTs over bi-sequences which compute the same distribution over i/o sequences as  $p$ .*

**Definition 15.** An affine variety is the set of solutions of a (maybe infinite) polynomial equation system:

$$\begin{cases} P_1(X_1, \dots, X_n) = 0 \\ \vdots \end{cases}$$

**Lemma 4.** Let  $p$  be a rank  $d$  distribution over bi-sequences computed by an FST. Then  $\mathcal{V}_p$  is an affine variety.

*Proof.* Let  $A$  be a  $d$ -state FST. The value computed by  $A$  for a given i/o sequence  $(s, t)$  is a polynomial in its parameter denoted  $P_{(s,t)}$ . Thus, the set of parameters corresponding to  $d$ -state FST computing a given value  $p((s, t))$  for  $(s, t)$  is an affine variety defined by  $\{(X_1, \dots, X_n) | P_{(s,t)} - p((s, t)) = 0\}$ , and  $\mathcal{V}_p$  is the affine variety defined by:  $\bigcap_{(s_i, t_j) \in \Sigma_+ \times \Sigma_-} \{(X_1, \dots, X_n) | P_{(s_i, t_j)} - p((s_i, t_j)) = 0\}$ .  $\square$

**Lemma 5.** Let  $p$  be a rank  $d$  distribution over bi-sequences computed by an FST. Then there exists a finite set  $G_p$  of i/o sequences, such that  $\mathcal{V}_p = \bigcap_{(s_i, t_j) \in G_p} \{(X_1, \dots, X_n) | P_{(s_i, t_j)} - p((s_i, t_j)) = 0\}$ . Such a set  $G_p$  is called a generative set for  $p$ .

*Proof.* The ring  $\mathbb{R}[X_1, \dots, X_n]$  is Noetherian, in particular the sequence  $I_k = \bigcap_{k' \leq k} \{(X_1, \dots, X_n) | P_{(s_{i_{k'}}, t_{j_{k'}})}(X_1, \dots, X_n) - p((s_{i_{k'}}, t_{j_{k'}})) = 0\}$  is stationary. One has  $\mathcal{V}_p = \bigcup_n I_n = \bigcup_{n \leq N} I_n$  for a certain  $N$ . One can take  $G_p = \bigcup_{n \leq N} (s_{i_n}, t_{j_n})$ .  $\square$

**Corollary 1.** Let  $p$  be a rank  $d$  distribution over i/o sequences computed by an FST. Let  $G_p$  be a generative set for  $p$ . Let  $A$  be an FST of rank  $\leq d$ . One then has:

$$r_A|_{G_p} = p|_{G_p} \Leftrightarrow r_A = p$$

### 7.2.1 Proof of Proposition 4

*Proof.* Let  $p$  be a rank  $d$  distribution over i/o sequences computed by an FST. Let  $G_p$  be a generative set for  $p$ . Let  $U_0$  (resp.  $V_0$ ) be the prefix-closure (resp. suffix-closure) of  $G_p$ . Let  $U_{i+1} = U_i \Sigma$ ,  $U = U_{d+1}$  and  $V_{i+1} = \Sigma V_i$ ,  $V = V_{d+1}$ . Let  $H_i$  be the minimum rank Hankel matrix over  $U_i$  and  $V_i$ , and let  $H$  be a minimum rank Hankel matrix over  $U$  and  $V$ . With Corollary 1 and Proposition 3, it is sufficient to prove that  $\text{rank}(H_d) = \text{rank}(H) = d$ . As the Hankel matrix of  $p$  fulfills the hypothesis, one has  $\text{rank}(H) \leq d$ . Among the family of  $(d+1)$  couples  $(H_0, H_1), \dots, (H_d, H)$ , one of them satisfies  $\text{rank}(H_i) = \text{rank}(H_{i+1})$ , because otherwise  $\text{rank}(H_i)$  would take  $d+2$  different values between 0 and  $d$ . Thus, the FST computed from  $H_{i+1}$  agrees on  $G_p$  with  $p$  by Proposition 3, and by Corollary 1, as  $G_p \subset U \times V$ , this FST computes  $p$ . By minimality of the rank, one has  $\text{rank}(H_i) = \text{rank}(H_{i+1}) = d$ , and thus  $\text{rank}(H_d) = \text{rank}(H) = d$ .  $\square$

### 7.3 Proof of the Proposition 5

**Lemma 6.** Let  $p$  be a rank  $d$  distribution computed by an FST. Let  $U$  and  $V$  be such as in Proposition 4. There exists  $\sigma > 0$  such  $H \in \mathcal{H}_0 \Rightarrow \sigma_d(H_\varepsilon) \geq \sigma$ , where  $\sigma_d(H_\varepsilon)$  is the  $d$ -th singular value of  $H_\varepsilon$ .

*Proof.* For  $\mu = 0$ , the rank minimization is equivalent to  $\text{rank}(H) \leq d$ , thus the set  $\mathcal{H}_0$  of the solutions of (1) is a closed bounded set, thus compact. Suppose that the assumption is false, this means, by compactity, that one can find a sequence  $H_n$  such that  $\sigma_d(H_{n\varepsilon})$  converges towards a matrix  $H_\omega$  such that  $\sigma_d(H_{\omega\varepsilon}) = 0$  by continuity of singular values. As  $H_\omega \in \mathcal{H}_0$ , The FST obtained from  $H_\omega$  computes  $p$ , which contradicts the fact that  $\text{rank}(H_{\omega\varepsilon}) = d$  (cf. proof of Proposition 4).  $\square$

**Lemma 7.** Let  $p$  be a distribution computed by a rank  $d$  FST. Let  $U$  and  $V$  be such as in Proposition 4. Let  $\sigma$  be as in Lemma 6. There exists  $\mu_2$  such that  $H \in \mathcal{H}_{\mu_2} \Rightarrow \sigma_d(H_\varepsilon) > \sigma/2$ .

*Proof.* Suppose the assumption is false: there exists a convergent sequence of Hankel matrices  $H_n \in \mathcal{H}_{1/n}$  such that  $\sigma_d(H_{n\varepsilon}) < \sigma/2$ , and whose limit is  $M_\omega$ . One then has  $H_\omega \in \mathcal{H}_0$ , and  $\sigma_d(H_{\omega\varepsilon}) \leq \sigma/2$  by continuity, which contradicts Lemma 6.  $\square$

In particular, this implies that, for a certain  $\mu_2$ , all the solutions  $\mathcal{H}_{\mu_2}$  of (1) will be such that  $H_\varepsilon$  is rank  $d$ , thus  $\mathcal{H}_{\mu_2}$  is compact.

**Lemma 8.** *Let  $p$  be a rank  $d$  distribution computed by an FST. Let  $U$  and  $V$  be such as in Proposition 6. For all  $\epsilon > 0$  there exists  $\mu_\epsilon$  such that  $H \in \mathcal{H}_{\mu_\epsilon} \Rightarrow \min_{H_0 \in \mathcal{H}_0} (\|H - H_0\|_F) \leq \epsilon$ .*

*Proof.* Let us consider  $\mu_\epsilon < \mu_2$ ,  $\mu_2$  being as in Lemma 7. The rank minimization is equivalent to  $\text{rank}(H) \leq d$ , thus the set  $\mathcal{H}_{\mu_\epsilon}$  is compact. Let us suppose that the assumption is false, and that there exists a sequence  $\mathcal{H}_n$  such that  $H_n \in \mathcal{H}_{1/n}$  and  $\min_{H_0 \in \mathcal{H}_0} (\|H_n - H_0\|_F) > \epsilon$ . The limit  $H_\omega$  belongs to  $\mathcal{H}_0$  and satisfies  $\min_{H_0 \in \mathcal{H}_0} (\|H_\omega - H_0\|_F) \geq \epsilon$  which is contradictory.  $\square$

**Lemma 9.** *Let  $p$  be a rank  $d$  distribution computed by an FST. Let  $U$  and  $V$  be such as in Proposition 4. Let  $\delta > 0$  be a confidence parameter. Let  $S$  be an i.i.d. sample of size  $N$ , drawn with respect to  $p$ . Let  $z_S = (p_S([s, t]))_{[s, t] \in U}$  be the vector of frequencies in the sample  $S$ , and let  $z = (p([s, t]))_{[s, t] \in U}$ . One has, with probability at least  $1 - \delta$ :*

$$\|z - z_S\|_2 < \frac{1 + \sqrt{2 \log(1/\delta)}}{\sqrt{N}}$$

*Proof.* Let  $S_i$  be a sample differing from  $S$  for the  $i$ -th entry. One has  $\|z_S - z_{S_i}\|_2 \leq \sqrt{2}/N = c_i$ . One also has  $\mathbb{E}(\|z - z_S\|_2^2) \leq 1/N$  because of the variance of a multinomial, and thus  $\mathbb{E}(\|z - z_S\|_2) \leq \sqrt{\mathbb{E}(\|z - z_S\|_2^2)} \leq 1/\sqrt{N}$ .

Applying the McDiarmid's inequality gives  $\mathbb{P}(\|z_S - z\|_2 \geq \mathbb{E}(\|z - z_S\|_2) + \epsilon) \leq e^{-\frac{\epsilon^2}{2 \sum c_i^2}}$ . With  $\delta = e^{-\frac{\epsilon^2}{2 \sum c_i^2}} = e^{-\frac{N \epsilon^2}{4}}$ , thus  $\epsilon = \sqrt{\frac{2 \log(1/\delta)}{N}}$ , one has the result.  $\square$

### 7.3.1 Proof of the Proposition 5

Let  $\mu_2$  be as in Lemma 7. By the Lemma 9, with probability  $1 - \delta$ , one has  $\mathcal{H}_0 \subset \mathcal{H}_\mu^S$ , thus  $\text{rank}(H) \leq d$  for any  $H \in \mathcal{H}_\mu^S$ . Moreover, as  $\mathcal{H}_\mu^S \subset \mathcal{H}_{2\mu}$ , the condition  $\mu < \mu_2$  implies that  $\text{rank}(H_\varepsilon) \geq d$  for any  $H \in \mathcal{H}_\mu^S$ .  $\square$

## 7.4 Proof of the Proposition 6

**Lemma 10.** *Let  $p$  be a rank  $d$  distribution computed by an FST. Let  $S$  be an i.i.d. sample of size  $N$  with respect to  $p$ . Let  $\delta > 0$  be a confidence parameter. For any  $\epsilon > 0$ , let  $\mu_\epsilon$  be as in Lemma 8. One supposes that*

$$N > \left( \frac{1 + \sqrt{2 \log(1/\delta)}}{\mu_\epsilon} \right)^2$$

*With probability  $1 - \delta$ , for any  $H \in \mathcal{H}_{\mu_\epsilon}^S$ ,  $\min_{H_0 \in \mathcal{H}_0} (\|H - H_0\|_F) < \epsilon$ .*

*Proof.* This is just Lemma 8 and Lemma 9 together.  $\square$

Let us define the distance between two models with the same rank:

**Definition 16.** *Let  $A = (\alpha_1, \alpha_\infty, M_x)$  and  $A' = (\alpha'_1, \alpha'_\infty, M'_x)$  be two FSTs with  $d$  states, on the same alphabet. One defines the distance*

$$|A, A'|_\infty = \max \left( \max_i (|(\alpha_1)_i - (\alpha'_1)_i|), \max_i (|(\alpha_\infty)_i - (\alpha'_\infty)_i|), \max_{i,j,x,y} (|(M_x)_{i,j} - (M'_x)_{i,j}|) \right)$$

Let us recall a result [12]:

**Lemma 11.** *Let  $H$  and  $H' = H + E$  be two  $n \times m$  matrices. Let  $\sigma_1 \geq \dots \geq \sigma_n$  be the singular values of  $H$ , and let  $\sigma'_1 \geq \dots \geq \sigma'_n$  be the singular values of  $H'$ . One then has*

$$|\sigma_i - \sigma'_i| \leq \|E\|_2$$

Let  $H = L^\top D R$  and  $H' = L'^\top D' R'$  be the singular value decompositions of  $H$  and  $H'$ . One has  $H^+ = R^\top D^{-1} L$  and  $H'^+ = R'^\top D'^{-1} L'$ . One has:

**Lemma 12.** *Let  $H$  and  $H' = H + E$  be two  $n \times m$  matrices. Let  $H = L^\top D R$  and  $H' = L'^\top D' R'$  be the singular value decompositions of  $H$  and  $H'$ . Let  $\sigma$  be such that  $\forall i, \sigma_i \geq \sigma, \sigma'_i \geq \sigma$ . One has*

$$\|D^{-1} - D'^{-1}\|_F \leq \|D^{-1} - D'^{-1}\|_* \leq \frac{d\|E\|_2}{\sigma^2}$$

*Proof.* On has  $|\frac{1}{\sigma_i} - \frac{1}{\sigma'_i}| \leq |\frac{\sigma'_i - \sigma_i}{\sigma_i \sigma'_i}| \leq \frac{\|E\|_2}{\sigma^2}$ , and one has the conclusion.  $\square$

The following result is straightforward from [19]:

**Lemma 13.** *Let  $H$  and  $H' = H + E$  be two matrices. Let  $\sigma_1 \geq \dots \geq \sigma_n$  be the singular values of  $H$ , and let  $\sigma'_1 \geq \dots \geq \sigma'_n$  be the singular values of  $H'$ . Let  $\sigma$  be such that  $\forall i, \sigma_i \geq \sigma, \sigma'_i \geq \sigma$ . Let  $H = L^\top D R$  and  $H' = L'^\top D' R'$  be the singular value decompositions of  $H$  and  $H'$ . One supposes that  $\|E\|_F \leq \sigma/2$ . One then has*

$$\|L - L'\|_F \leq \frac{4(2\sqrt{d}\|H\|_F\|E\|_F + \|E\|_F^2)}{\sigma^2}, \|R - R'\|_F \leq \frac{4(2\sqrt{d}\|H\|_F\|E\|_F + \|E\|_F^2)}{\sigma^2}$$

#### 7.4.1 Proof of Proposition 6

Let  $\mu_\epsilon$  be as in Lemma 8. The condition on  $N$  implies  $\mu < \mu_\epsilon$ . Let  $H \in \mathcal{H}_\mu^S$ , there exists  $H' \in \mathcal{H}_0$  such that  $\|H - H'\|_F < \epsilon$ . One has  $\|L\|_F = \|L'\|_F = \|R\|_F = \|R'\|_F = \sqrt{d}$ , as the matrices are orthonormal. One has also  $\|D^{-1}\|_F \leq \sqrt{d}/\sigma$ . One uses the equality  $AB - A'B' = (A - A')B - (A - A')(B - B') + A(B - B')$ . One has

$$\begin{aligned} H^+ - H'^+ &= L^\top D^{-1} R - L'^\top D'^{-1} R' \\ &= L^\top [(D^{-1} - D'^{-1})R - (D^{-1} - D'^{-1})(R - R') + D^{-1}(R - R')] \\ &\quad - (L^\top - L'^\top)[(D^{-1} - D'^{-1})R - (D^{-1} - D'^{-1})(R - R') + D^{-1}(R - R')] + (L^\top - L'^\top)D^{-1}R \end{aligned}$$

Using the previous inequalities, and keeping only the first order terms, leads to

$$\|H^+ - H'^+\|_F \leq O\left(\frac{d^2 \epsilon}{\sigma^3}\right)$$

One also has  $\|H^+\|_F \leq \frac{d^2}{\sigma}$ . Plugging all those inequalities in the formulas computing the FSTs parameters leads to the result.  $\square$
